# Supplementary material for: A systematic review of pharmacists’ interventions to support medicines optimisation in patients with visual impairment
Source: Springer Nature journal article supplement (doi:10.1007/s11096-019-00907-2), 2019-09-17
Supplement: MOESM1 [file 17180906]

A systematic review of pharmacists' interventions to support medicines optimisation in patients with visual impairment

International Journal of Clinical Pharmacy

Basma Y. Kentab · Heather E. Barry · Sinaa A. Alaqeel · Carmel M. Hughes

Corresponding author : Professor Carmel M. Hughes, School of Pharmacy, Queen's University Belfast, Email: c.hughes@qub.ac.uk.

## Online Resource 1 MEDLINE search strategy

- 1) exp Visually Impaired Persons/ or (Visually adj3 Impaired adj3 Person\*).tw.
- 2) exp Vision Disorders/
- 3) exp Blindness/ or blindness.tw.
- 4) exp Vision, Low/
- 5) ((low\* or handicap\* or subnormal\* or impair\* or partial\* or disab\* or reduce\* or diminish\* or decrease\* or problem\* or disorder\* or loss or disease\* or defect\* or disturb\*) adj3 (vision or visual\* or sight\* or eye or eyes or eyesight or sight)).tw.
- 6) Blind\*.tw.
- 7) (rehabilitat\* adj4 (vision or visual\* or sight\* or eye or eyes or sight or eyesight)).tw.
- 8) 1 or 2 or 3 or 4 or 5 or 6 or 7
- 9) Pharmacists/ or Pharmacist\*.tw.
- 10) Pharmacy/ or Pharmacies/ or Pharmacy Service, Hospital/ or Community Pharmacy Services/
- 11) (Pharmacy or Pharmacies or (pharmacy adj3 service\*) or (Hospital adj3 Pharmacy adj3 Service\*) or (Community adj3 Pharmacy adj3 Service\*) or (Clinical adj3 Pharmacy) or (Community adj3 Pharmacy) or (retail adj3 pharmacy) or (Hospital adj3 Pharmacy)).tw.
- 12) exp Pharmaceutical Services/ or (Pharmaceutical adj3 Service\*).tw.
- 13) Pharmaceutical Care.tw.
- 14) exp Medication Therapy Management/
- 15) (medication\* therapy management or drug\* therapy management or medication\* management or medicine\* management or drug\* management or medication\* reconciliation or medicine\* reconciliation or MTM).tw.
- 16) 9 or 10 or 11 or 12 or 13 or 14 or 15
- 17) exp Drug Therapy/
- 18) exp Pharmaceutical Preparations/
- 19) exp Prescription Drugs/
- 20) exp Nonprescription Drugs/
- 21) ((pharmaceutical or pharmacological) adj3 (preparation\* or substance\* or treatment or therapy)).tw.
- 22) (medication\* or medicine\* or drug\* or pharmacotherapy or pharmaco-therapy).tw.
- 23) ((over the counter or otc or nonprescription or prescription) adj2 (drug\* or medicine\* or medication\* or agent\* or product\*)).tw.
- 24) 17 or 18 or 19 or 20 or 21 or 22 or 23
- 25) exp Patient Satisfaction/

- 26) exp Patient Preference/
- 27) ((patient adj3 preference) or (patient adj3 satisfaction)).tw.
- 28) exp Medication Errors/
- 29) exp Inappropriate Prescribing/
- 30) ((medication\* or medicine\* or drug\*) adj3 (safety or incident\* or error\* or misadventure\*)).tw.
- 31) ((pharmacist\* or prescrib\* or prescription\* or dispens\* or dosing\* or drug\*) adj2 (error\* or mistake\* or miscalculat\*)).tw.
- 32) (inappropriate adj3 (prescription\* or medication\* or medicine\* or drug\*)).tw.
- 33) ((appropriat\* or inappropriat\* or optimal) adj2 (prescrib\* or dispens\* or dosing\*)).tw.
- 34) exp Patient Compliance/
- 35) ((patient\* or medication\* or drug\* or therapy or treatment) adj3 (compliance or adherence)).tw.
- 36) (adher\* or non-adher\* or nonadher\*).tw.
- 37) (compliance\* or noncompliance\* or non-compliance\*).tw.
- 38) exp Medication Adherence/
- 39) exp "Quality of Life"/
- 40) ("quality of life" or "HRQL" or (life adj3 quality) or (health adj3 quality adj3 life)).tw.
- 41) exp Decision Making/
- 42) decision support techniques/
- 43) Decision Support Systems, Clinical/
- 44) ((share\* or sharing\* or informed\*) adj3 (decision\* or deciding\* or choice\*)).tw.
- 45) ((decision\* or choice\*) adj3 (making\* or support\* or behavior\* or aid\*)).tw.
- 46) 25 or 26 or 27 or 28 or 29 or 30 or 31 or 32 or 33 or 34 or 35 or 36 or 37 or 38 or 39 or 40 or 41 or 42 or 43 or 44 or 45
- 47) 9 and 17 and 24 and 46
- 48) limit 47 to humans
